# Supplementary material
Source: Springer Nature journal article supplement (https://www.springermedizin.de/resource/supplementary/12943_2013_1287_MOESM3_ESM.pdf/9553156)

A

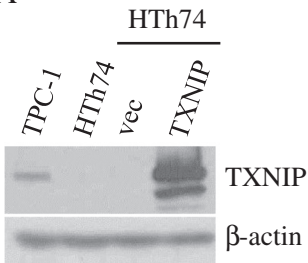

B

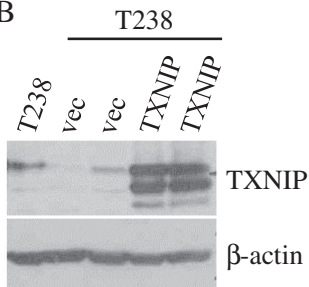

C

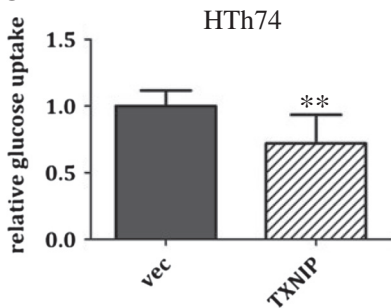

D

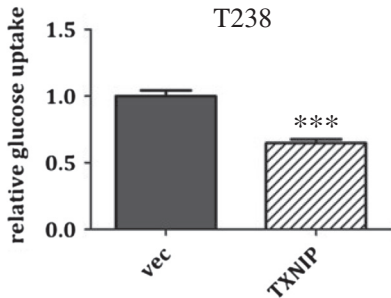

Supplement: MOESM3 [file 9553156]
